# Supplementary material for: A bimodal-pore strategy for synthesis of Pt3Co/C electrocatalyst toward oxygen reduction reaction
Source: Royal Society of Chemistry journal article supplement (doi:10.1039/d1cc00711d), 2021-01-01
Supplement: d1cc00711d1.pdf [file d1cc00711d1.pdf]

## Supporting Information

### **A bimodal-pore strategy for synthesis of Pt<sub>3</sub>Co/C electrocatalyst toward oxygen reduction reaction**

Wei Hong,<sup>a</sup> Xinran Shen,<sup>a</sup> Fangzheng Wang,<sup>a</sup> Xin Feng,<sup>b</sup> Jing Li\*<sup>a</sup> and Zidong Wei\*<sup>a</sup>

*<sup>a</sup>School of Chemistry and Chemical Engineering, Chongqing University, Shapingba 174, Chongqing 400044, China. E-mail: lijing@cqu.edu.cn; zdwei@cqu.edu.cn*

*<sup>b</sup>School of Materials Science and Engineering, Chongqing University, Shapingba 174, Chongqing 400044, China*

## **Experimental Section**

### **Synthesis of SiO<sub>2</sub>/C**

0.4 g resorcinol and 1.2 g CTAB were mixed with 12 mL ethanol and 48 mL deionized water to form a uniform solution, into which 0.4 mL 28% ammonia solution and 0.56 mL formaldehyde were further introduced. Several minutes later, the original clear solution becomes a milk-like solution, indicating formation of an emulsion solution. After adding 2 mL TEOS into the solution and continuously stirring it for 24 h at room temperature, the solution was transferred into a 100 mL Teflon-lined autoclave to conduct a hydrothermal reaction at 80 °C for 24 h. Finally, the collected precipitate was annealed at 850 °C for 3 h under N<sub>2</sub> flow with a ramp rate of 1 °C min<sup>-1</sup>.

### **Synthesis of Pt<sub>3</sub>Co/C-O**

100 mg SiO<sub>2</sub>/C powder, 0.031 mmol H<sub>2</sub>PtCl<sub>6</sub>·6H<sub>2</sub>O and 0.093 mmol Co(NO<sub>3</sub>)<sub>2</sub>·6H<sub>2</sub>O were sequentially added into 50 mL deionized water and the obtained solution was continuously stirred for 12 h to allow ion diffusion into the inner pores. After drying and annealing the product at 600 °C for 2 h under H<sub>2</sub>/N<sub>2</sub> gas mixture (10 vol% H<sub>2</sub>) flow, Pt<sub>3</sub>Co alloy nanoparticles would be in-situ formed in the CTAB-templated pores. Finally etching SiO<sub>2</sub> with HF solution and exhaustedly washing the sample with deionized water would lead to the final Pt<sub>3</sub>Co/C-O product.

### **Synthesis of Pt<sub>3</sub>Co/C-B**

Firstly, etching SiO<sub>2</sub>/C powder (100 mg) in HF solution at room temperature would

result in porous carbon C. Then the obtained carbon C, 0.031 mmol  $\text{H}_2\text{PtCl}_6 \cdot 6\text{H}_2\text{O}$  and 0.093 mmol  $\text{Co}(\text{NO}_3)_2 \cdot 6\text{H}_2\text{O}$  were dispersed into 50 mL deionized water and the obtained solution was continuously stirred for 12 h to allow ion diffusion into the inner pores. After drying and annealing the dried powder at 600 °C for 2 h under  $\text{H}_2/\text{N}_2$  gas mixture (10 vol%  $\text{H}_2$ ) flow, the final  $\text{Pt}_3\text{Co}/\text{C-B}$  product can be achieved.

### **Characterizations**

X-ray diffraction (XRD) patterns were obtained on a Rigaku D/Max 2200PC diffractometer with  $\text{Cu K}\alpha$  radiation and the scanning rate was  $1^\circ \text{ min}^{-1}$ . Transmission electron microscopy (TEM) analyses were performed on a Philips Tecnai G2F20 microscope at an voltage of 200 kV. Scanning electron microscope (SEM) images were obtained on a S-4800 HITACHI microscope. Nitrogen sorption isotherms data were obtained on a Micromeritics Gemini VII 2390 analyzer. Before measurements, the catalysts were degassed in vacuo at 140 °C for 6 h. X-ray photoelectron spectrometer (XPS) was operated on a Kratos XSAM800 spectrometer with a monochromatic Al X-ray source (Al KR, 1.4866 keV).

### **Electrochemical measurements**

The electrochemical measurements were recorded by a three-electrode system. A graphite rod was used as counter electrode, the  $\text{Ag}/\text{AgCl}$  (3.0 M KCl) electrode was used as reference electrode and the glassy carbon electrode ( $0.196 \text{ cm}^2$ ) with loaded with our catalysts was used as working electrode. All potentials in this work are

converted to a reversible hydrogen electrode (RHE). The homogeneous catalyst ink was prepared by ultrasonically dispersing the as-prepared catalyst powder in a mixed solution containing 10 uL Nafion solution and 1600 uL ethanol for 30 min. Then, 20 uL catalyst ink was deposited onto the glassy carbon electrode and dried naturally at room temperature. The Pt loading of all catalysts was  $17.8 \text{ ug cm}^{-2}$ .

Before electrochemical tests, all catalysts were first pretreated by cyclic voltammetry (CV) between 0.05 and 1.2 V at  $50 \text{ mV s}^{-1}$  in  $\text{N}_2$ -saturated 0.1 M  $\text{HClO}_4$  for 50 cycles. Electrochemical active surface area (ECSA) was calculated by CO stripping (electro-oxidation of adsorbed CO) method. Oxygen reduction reaction (ORR) polarization curves were conducted in  $\text{O}_2$ -saturated 0.1 M  $\text{HClO}_4$  solution with a rotation speed of 1600 rpm and at scan rate of  $10 \text{ mV s}^{-1}$ . The ORR polarization curves were collected with the current densities corrected by ohmic iR drop compensation. The accelerated durability test (ADT) was conducted at room temperature by CV between 0.6 and 1.1 V at  $50 \text{ mV s}^{-1}$  in  $\text{O}_2$ -saturated 0.1 M  $\text{HClO}_4$  for 10000 CV cycles.

The ECSA was calculated by the following Equation (1):

$$\text{ECSA} = Q_{\text{CO}} / (0.42 * [\text{Pt}]) \quad (1)$$

Where  $Q_{\text{CO}}$  (mC) represents the electro-oxidation of adsorbed CO,  $0.42 \text{ mC cm}^{-2}$  is the electrical charge for oxidizing a monolayer of CO on Pt, and [Pt] is the loading amount of Pt on the working electrode. The specific kinetic current densities ( $j_k$ ) associated with the intrinsic activity of the catalysts and can be calculated according the following

Equation (2):

$$j_k = \frac{j_d * j}{j_d - j} \quad (2)$$

Where  $j$  represents the measured current density,  $j_d$  represents the diffusion limited current density and  $j_k$  represents the kinetic current density.

### **Antiflooding Measurements**

The chronopotentiometry curves were measured in O<sub>2</sub>-saturated 0.1 M HClO<sub>4</sub> solutions using a self-made working electrode at a constant current. Firstly, homogeneous catalyst ink consisting of Nafion, ethanol and catalyst (with mass ratio of Nafion to catalyst = 0.35:1) was deposited onto the carbon paper with Pt loading of 0.075 mg cm<sup>-2</sup> (area = 1.0 cm<sup>2</sup>). The catalyst was dried naturally under ambient condition and loaded into the ring groove of the working electrode. The chronopotentiometry curves were also recorded by a three-electrode system. A carbon rod was used as counter electrode and an Ag/AgCl (3.0 M KCl) was used as reference electrode. O<sub>2</sub> is flowed maintained at 10 mL min<sup>-1</sup> during test.

### **MEA Preparation and Testing**

The prepared catalysts and commercial Pt/C (20 wt%) were made into fuel cell cathodes to investigate their applicability. Simply, the homogeneous catalyst ink was prepared by ultrasonically dispersing catalyst, ethanol and Nafion. The Nafion content was 35 wt% in the dried catalyst layer. The obtained catalyst ink was then applied onto the surface of carbon paper in an active area of 5.0 cm<sup>2</sup> and dried under ambient condition.

The Pt loading of cathode and anode are  $0.060 \text{ mg cm}^{-2}$  and  $0.080 \text{ mg cm}^{-2}$ , respectively. During  $\text{H}_2\text{-O}_2$  fuel cell testing, both hydrogen and oxygen have a flow rate of  $160 \text{ mL min}^{-1}$ . The cell temperature was maintained at  $80 \text{ }^\circ\text{C}$  and the back pressure was set at  $170 \text{ kPa}$  for both  $\text{H}_2$  and  $\text{O}_2$ . For  $\text{H}_2$ -air fuel cell tests, pure hydrogen has a flow rate of  $160 \text{ mL min}^{-1}$ , while the air flow rate is  $520 \text{ mL min}^{-1}$ . The cell temperature was maintained at  $80 \text{ }^\circ\text{C}$  and the back pressure was set at  $100 \text{ kPa}$  for both  $\text{H}_2$  and air. All tests were conducted at full humidification of anode and cathode.

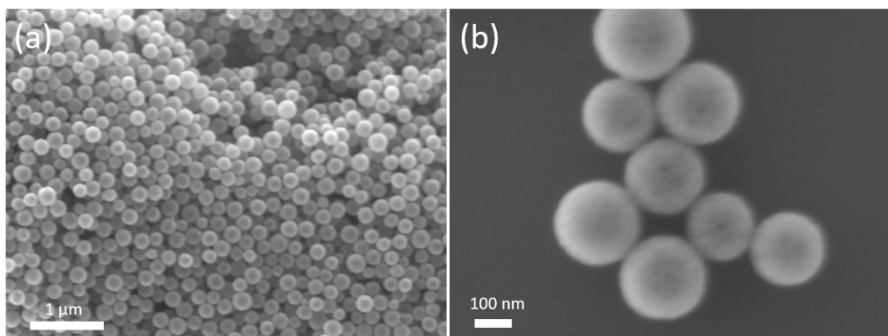

**Fig. S1.** SEM images of SiO<sub>2</sub>/C (a, b)

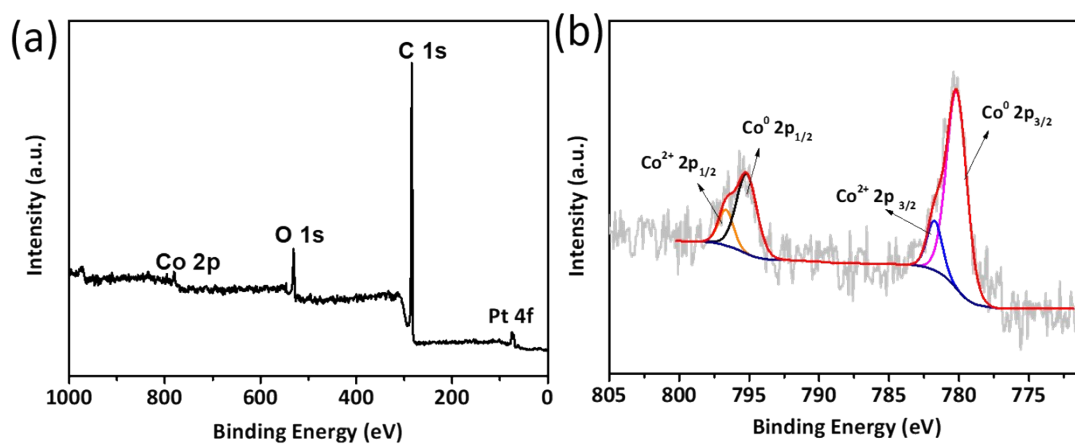

**Fig. S2.** XPS survey (a) and high-resolution Co 2p spectrum (b) of Pt<sub>3</sub>Co/C-O.

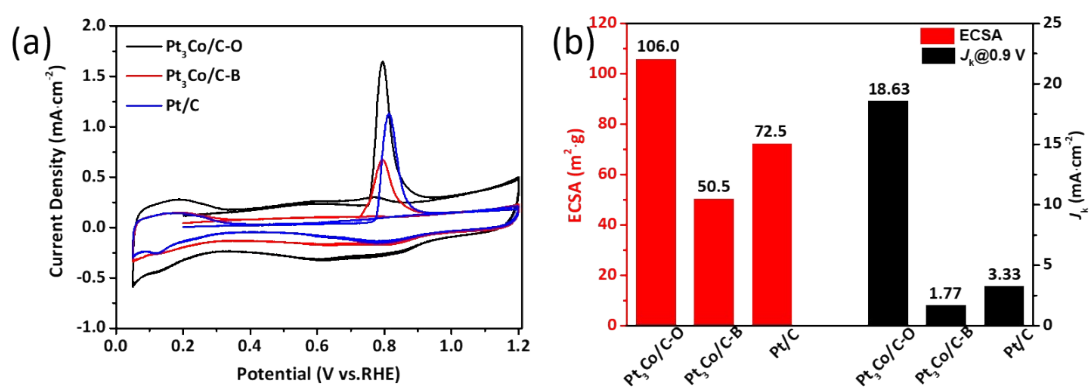

**Fig. S3.** (a) The CO-stripping curves of Pt/C, Pt<sub>3</sub>Co/C-B and Pt<sub>3</sub>Co/C-O recorded in CO-saturated 0.1 M HClO<sub>4</sub> solution at scan rate of 10 mV s<sup>-1</sup>; (b) The ECSA and  $J_k$  of Pt/C, Pt<sub>3</sub>Co/C-B and Pt<sub>3</sub>Co/C-O.

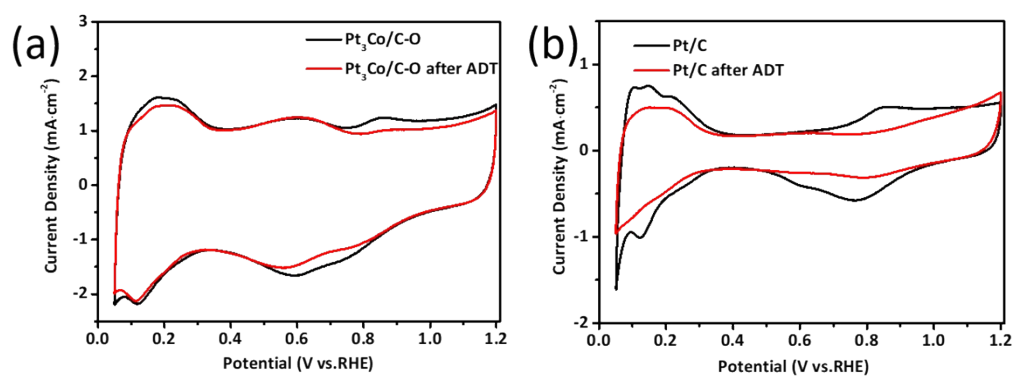

**Fig. S4.** CV curves of Pt<sub>3</sub>Co/C-O (a) and Pt/C (b) catalyst before and after 10 000 potential cycles between 0.6 and 1.1 V versus RHE.

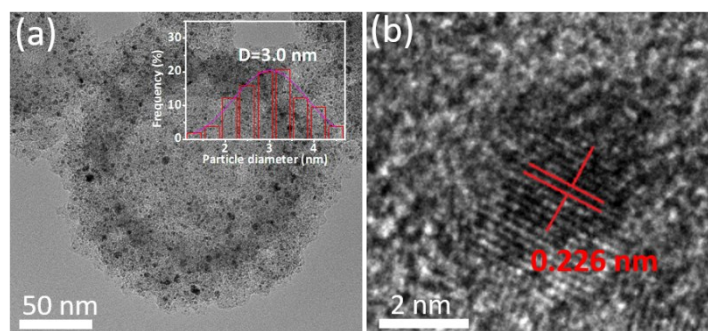

**Fig. S5.** TEM image (a), particle size distribution (inset) and HRTEM image (b) of Pt<sub>3</sub>Co/C-O catalyst after 10000 CV cycles between 0.6 and 1.1 V in O<sub>2</sub>-saturated 0.1 M HClO<sub>4</sub> at a scan rate of 50 mV s<sup>-1</sup>.



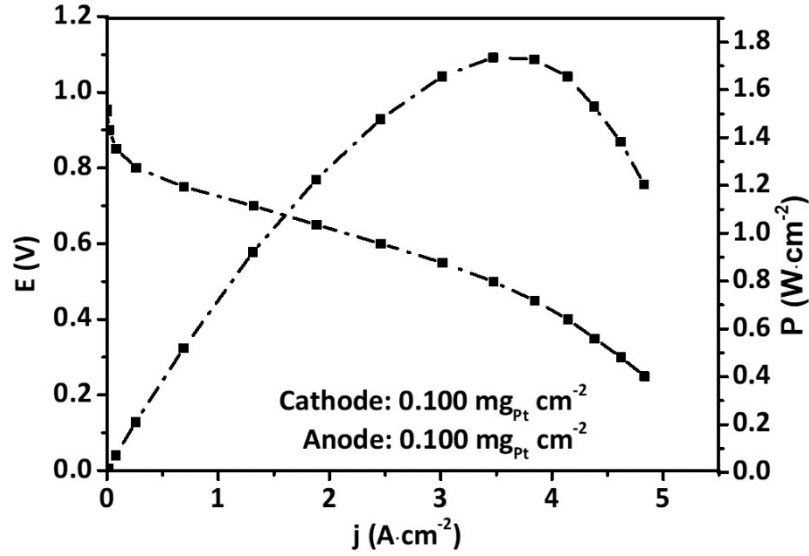

**Fig. S6** Polarization curve and power density of H<sub>2</sub>-O<sub>2</sub> fuel cell with Pt<sub>3</sub>Co/C-O as cathode and Pt/C as anode.

**Table S1.** Pore parameters of the catalysts.

| Sample                 | S <sub>BET</sub> <sup>a</sup><br>(m <sup>2</sup> g <sup>-1</sup> ) | V <sub>t</sub> <sup>b</sup><br>(cm <sup>3</sup> g <sup>-1</sup> ) | V <sub>micro</sub> <sup>c</sup><br>(cm <sup>3</sup> g <sup>-1</sup> ) | V <sub>meso/macro</sub> <sup>d</sup><br>(cm <sup>3</sup> g <sup>-1</sup> ) | D <sup>e</sup><br>(nm) |
|------------------------|--------------------------------------------------------------------|-------------------------------------------------------------------|-----------------------------------------------------------------------|----------------------------------------------------------------------------|------------------------|
| SiO <sub>2</sub> /C    | 377.8                                                              | 0.811                                                             | 0.022                                                                 | 0.789                                                                      | 2.3                    |
| Pt <sub>3</sub> Co/C-B | 851.4                                                              | 1.840                                                             | 0.050                                                                 | 1.790                                                                      | 2~7                    |
| Pt <sub>3</sub> Co/C-O | 804.0                                                              | 1.809                                                             | 0.069                                                                 | 1.740                                                                      | 2~9                    |
| Pt/C                   | 122.4                                                              | 1.681                                                             | 0.0021                                                                | 1.679                                                                      | 2~10                   |

<sup>a</sup>BET specific surface area.

<sup>b</sup>Total pore volume, V<sub>t</sub>=V<sub>meso/macro</sub>+V<sub>micro</sub>.

<sup>c</sup>t-Plot micropore volume.

<sup>d</sup>BJH adsorption cumulative volume of pores (d>2 nm).

<sup>e</sup>Pore sizes.

**Table S2.** Comparisons of the ORR performances at half-cell level.

| Catalyst                                                         | $E_{\text{onset}}$ (V) | $E_{1/2}$ (V)     | MA@0.9 V<br>(A mg <sub>pt</sub> <sup>-1</sup> ) | Ref              |
|------------------------------------------------------------------|------------------------|-------------------|-------------------------------------------------|------------------|
| <b>Pt<sub>3</sub>Co/C-O</b>                                      | <b>1.067</b>           | <b>0.930</b>      | <b>1.04</b>                                     | <b>This work</b> |
| <b>Pt<sub>3</sub>Co/C-B</b>                                      | <b>1.014</b>           | <b>0.847</b>      | <b>0.10</b>                                     | <b>This work</b> |
| Ordered Fe <sub>3</sub> Pt/Ti <sub>0.5</sub> Cr <sub>0.5</sub> N | 1.03                   | 0.92 <sup>a</sup> | 0.673                                           | 1                |
| Ga-Pt <sub>3</sub> Co/C                                          | 1.0 <sup>a</sup>       | 0.894             | 0.75                                            | 2                |
| Pd@Pt <sub>1L</sub> Octahedra                                    | 0.98 <sup>a</sup>      | 0.9 <sup>a</sup>  | 0.75                                            | 3                |
| Pt-Pd SBCNC                                                      | 1.05 <sup>a</sup>      | 0.9 <sup>a</sup>  | 0.87                                            | 4                |
| PtCo <sub>3</sub> -H600                                          | 1.0 <sup>a</sup>       | 0.9 <sup>a</sup>  | 0.74                                            | 5                |
| Pt-o-Cu <sub>3</sub> Pt/C                                        | 1.03 <sup>a</sup>      | 0.92 <sup>a</sup> | 0.64                                            | 6                |
| PtFeNi                                                           | 1.02 <sup>a</sup>      | 0.92 <sup>a</sup> | 0.63                                            | 7                |
| O-Pt-Fe@NC/C                                                     | 1.0 <sup>a</sup>       | 0.9 <sup>a</sup>  | 0.53                                            | 8                |
| L1 <sub>0</sub> -FePt/Pt                                         | 1.02 <sup>a</sup>      | 0.945             | 0.7                                             | 9                |
| Pt <sub>4.8</sub> Fe/PCNF                                        | 0.978                  | 0.824             | 0.013 <sup>a</sup>                              | 10               |

<sup>a</sup>The data are not given in the literatures, but excavated from the Fig.

**Table S3.** Comparisons of the ORR performances at MEA-level.

| Catalyst                                   | Anode<br>Loading<br>(mg <sub>Pt</sub> cm <sup>-2</sup> ) | Cathode<br>Loading<br>(mg <sub>Pt</sub> cm <sup>-2</sup> ) | Power<br>Density<br>(W cm <sup>-2</sup> ) | Current<br>density<br>at 0.6 V<br>(mA cm <sup>-2</sup> ) | P <sup>a</sup><br>(W mg <sub>Pt</sub> <sup>-1</sup> ) | Ref.             |
|--------------------------------------------|----------------------------------------------------------|------------------------------------------------------------|-------------------------------------------|----------------------------------------------------------|-------------------------------------------------------|------------------|
| <b>Pt<sub>3</sub>Co/C-O</b>                | <b>0.080</b>                                             | <b>0.060</b>                                               | <b>1.33</b>                               | <b>1780</b>                                              | <b>9.5</b>                                            | <b>This work</b> |
| <b>Pt<sub>3</sub>Co/C-B</b>                | <b>0.080</b>                                             | <b>0.060</b>                                               | <b>0.88</b>                               | <b>1370</b>                                              | <b>6.3</b>                                            | <b>This work</b> |
| Pt <sub>A</sub> @Fe <sub>SA</sub> -<br>N-C | 0.130                                                    | 0.200                                                      | 1.31                                      | 1800                                                     | 3.97                                                  | 11               |
| cBCP-PtFe                                  | 0.200                                                    | 0.010                                                      | 0.92                                      | 1300                                                     | 4.4                                                   | 12               |
| PtNi/GC-<br>1600 oct                       | 0.200                                                    | 0.400                                                      | 0.818                                     | 850 <sup>b</sup>                                         | 1.36                                                  | 13               |
| PtMg/C                                     | 0.120                                                    | 0.120                                                      | 1.27                                      | 1550 <sup>b</sup>                                        | 5.3                                                   | 14               |
| LP@PF-2                                    | 0.350                                                    | 0.035                                                      | 1.41                                      | 1450                                                     | 3.7                                                   | 15               |
| PtNi@Pt/C                                  | 0.200                                                    | 0.200                                                      | 2.40                                      | 3100                                                     | 6.0                                                   | 16               |

<sup>a</sup>Peak power density normalized to the Pt loading of the whole cell.

<sup>b</sup>The data are not given in the literatures, but excavated from the H<sub>2</sub>-O<sub>2</sub> fuel cell polarization curves.

## References

- 1 Q. Liu, L. Du, G. Fu, Z. Cui, Y. Li, D. Dang, X. Gao, Q. Zheng and J. B. Goodenough, *Advanced Energy Materials*, 2019, 3, 1803040.
- 2 M. Li, Z. Zhao, Z. Xia, Y. Yang, M. Luo, Y. Huang, Y. Sun, Y. Chao, W. Yang, W. Yang, Y. Yu, G. Lu and S. Guo, *ACS Catalysis*, 2020, 5, 3018-3026.
- 3 M. Zhou, H. Wang, A. O. Elnabawy, Z. D. Hood, M. Chi, P. Xiao, Y. Zhang, M. Mavrikakis and Y. Xia, *Chemistry of Materials*, 2019, 4, 1370-1380.
- 4 R. Wu, P. Tsiakaras and P. K. Shen, *Applied Catalysis B-Environmental*, 2019, 251, 49-56.
- 5 Z. Wang, X. Yao, Y. Kang, L. Miao, D. Xia and L. Gan, *Advanced Functional Materials*, 2019, 35, 1902987
- 6 N. Cheng, L. Zhang, S. Mi, H. Jiang, Y. Hu, H. Jiang and C. Li, *ACS Applied Materials & Interfaces*, 2018, 44, 38015-38023.
- 7 H. Kuroki, T. Tamaki, M. Matsumoto, M. Arao, K. Kubobuchi, H. Imai and T. Yamaguchi, *Industrial & Engineering Chemistry Research*, 2016, 44, 11458-11466.
- 8 Y. Hu, T. Shen, X. Zhao, J. Zhang, Y. Lu, J. Shen, S. Lu, Z. Tu, H. L. Xin and D. Wang, *Applied Catalysis B-Environmental*, 2020, 279, 119370.
- 9 J. Li, Z. Xi, Y.-T. Pan, J. S. Spendelow, P. N. Duchesne, D. Su, Q. Li, C. Yu, Z. Yin, B. Shen, Y. S. Kim, P. Zhang and S. Sun, *Journal of the American Chemical Society*, 2018, 8, 2926-2932.
- 10 L. Mao, K. Fu, J. Jin, S. Yang and G. Li, *International Journal of Hydrogen Energy*, 2019, 33, 18083-18092.
- 11 X. Ao, W. Zhang, B. Zhao, Y. Ding, G. Nam, L. Soule, A. Abdelhafiz, C. Wang and M. Liu, *Energy & Environmental Science*, 2020, 13, 3032-3040.
- 12 J. Choi, Y. J. Lee, D. Park, H. Jeong, S. Shin, H. Yun, J. Lim, J. Han, E. J. Kim, S. S. Jeon, Y. Jung, H. Lee and B. J. Kim, *Energy & Environmental Science*, 2020, 13, 4921-4929.
- 13 J. Wang, Q. Xue, B. Li, D. Yang, H. Lv, Q. Xiao, P. Ming, X. Wei and C. Zhang, *ACS Applied Materials & Interfaces*, 2020, 12, 7047-7056.
- 14 E. B. Tetteh, H.-Y. Lee, C.-H. Shin, S.-h. Kim, H. C. Ham, T.-N. Tran, J.-H. Jang, S. J. Yoo and J.-S. Yu, *ACS Energy Letters*, 2020, 5, 1601-1609.
- 15 L. Chong, J. Wen, J. Kubal, F. G. Sen, J. Zou, J. Greeley, M. Chan, H. Barkholtz, W. Ding and D.-J. Liu, *Science*, 2018, 362, 1276.
- 16 J. Choi, J.-H. Jang, C.-W. Roh, S. Yang, J. Kim, J. Lim, S. J. Yoo and H. Lee, *Applied Catalysis B-Environmental*, 2018, 225, 530-537.
